# Supplementary material
Source: HighWire-hosted journal article supplement (https://gut.bmj.com/content/69/2/201)
Supplement: inline-supplementary-material-1 [file inline-supplementary-material-1.xlsx]

## Sheet: Table1
uniqueId	section	clincalQuestion	population	intervention	comparator	outcome
CQ37.1	Other guideline section	What is/are the aim(s) of surveillance?	No PICO	No PICO	No PICO	No PICO
CQ37.2	Other guideline section	What is/are the aim(s) of surveillance?	No PICO	No PICO	No PICO	No PICO
CQ37.3	Other guideline section	What is/are the aim(s) of surveillance?	No PICO	No PICO	No PICO	No PICO
CQ37.4	Other guideline section	What is/are the aim(s) of surveillance?	No PICO	No PICO	No PICO	No PICO
CQ37.5	Other guideline section	What is/are the aim(s) of surveillance?	No PICO	No PICO	No PICO	No PICO
CQ37.6	Other guideline section	What is/are the aim(s) of surveillance?	No PICO	No PICO	No PICO	No PICO
CQ37.7	Other guideline section	What is/are the aim(s) of surveillance?	No PICO	No PICO	No PICO	No PICO
CQ37.8	Other guideline section	What is/are the aim(s) of surveillance?	No PICO	No PICO	No PICO	No PICO
CQ37.9	Other guideline section	What is/are the aim(s) of surveillance?	No PICO	No PICO	No PICO	No PICO
CQ37.10	Other guideline section	What is/are the aim(s) of surveillance?	No PICO	No PICO	No PICO	No PICO
CQ37.11	Other guideline section	What is/are the aim(s) of surveillance?	No PICO	No PICO	No PICO	No PICO
CQ1.1	First surveillance	Who is at increased risk of developing CRC or advanced adenomas post-polypectomy (polyp clearance) at index colonoscopy?	Adults (18 years or over) who have been diagnosed with at least one colorectal adenoma and all detected adenomas have been resected completely.	Polyp: High grade dysplasia	Polyp: Low grade dysplasia	Advanced adenoma incidence at next surveillance (diameter &ge;10mm or HGD or villous component &ge;25%); CRC incidence at next surveillance (includes interval CRCs as well if reported); Long-term CRC incidence; Long-term CRC mortality
CQ1.2	First surveillance	Who is at increased risk of developing CRC or advanced adenomas post-polypectomy (polyp clearance) at index colonoscopy?	Adults (18 years or over) who have been diagnosed with at least one colorectal adenoma and all detected adenomas have been resected completely.	Polyp: Villous component &ge;25% (tubulovillous or villous histology)	Polyp: NO Villous component &ge;25% (tubulovillous or villous histology)	Advanced adenoma incidence at next surveillance (diameter &ge;10mm or HGD or villous component &ge;25%); CRC incidence at next surveillance (includes interval CRCs as well if reported); Long-term CRC incidence; Long-term CRC mortality
CQ1.3	First surveillance	Who is at increased risk of developing CRC or advanced adenomas post-polypectomy (polyp clearance) at index colonoscopy?	Adults (18 years or over) who have been diagnosed with at least one colorectal adenoma and all detected adenomas have been resected completely.	Polyp: Size of largest adenoma (variants: &ge;10mm, or &ge;20mm)	Polyp: Size of largest adenoma NOT greater than (variants: &ge;10mm, or &ge;20mm)	Advanced adenoma incidence at next surveillance (diameter &ge;10mm or HGD or villous component &ge;25%); CRC incidence at next surveillance (includes interval CRCs as well if reported); Long-term CRC incidence; Long-term CRC mortality
CQ1.4	First surveillance	Who is at increased risk of developing CRC or advanced adenomas post-polypectomy (polyp clearance) at index colonoscopy?	Adults (18 years or over) who have been diagnosed with at least one colorectal adenoma and all detected adenomas have been resected completely.	Polyp: Number of adenomas (variants: 1,2,3,4,5-9,10+; the main categories may be 1-2, 3-4 and 5+ but we would like to capture all reported variations)	N/a	Advanced adenoma incidence at next surveillance (diameter &ge;10mm or HGD or villous component &ge;25%); CRC incidence at next surveillance (includes interval CRCs as well if reported); Long-term CRC incidence; Long-term CRC mortality
CQ1.5	First surveillance	Who is at increased risk of developing CRC or advanced adenomas post-polypectomy (polyp clearance) at index colonoscopy?	Adults (18 years or over) who have been diagnosed with at least one colorectal adenoma and all detected adenomas have been resected completely.	Polyp: Presence of adenoma in proximal colon	Polyp: Absence of adenoma in proximal colon	Advanced adenoma incidence at next surveillance (diameter &ge;10mm or HGD or villous component &ge;25%); CRC incidence at next surveillance (includes interval CRCs as well if reported); Long-term CRC incidence; Long-term CRC mortality
CQ1.6	First surveillance	Who is at increased risk of developing CRC or advanced adenomas post-polypectomy (polyp clearance) at index colonoscopy?	Adults (18 years or over) who have been diagnosed with at least one colorectal adenoma and all detected adenomas have been resected completely.	Polyp: Adenoma morphology (variants: pedunculated, sessile, flat)	N/a	Advanced adenoma incidence at next surveillance (diameter &ge;10mm or HGD or villous component &ge;25%); CRC incidence at next surveillance (includes interval CRCs as well if reported); Long-term CRC incidence; Long-term CRC mortality
CQ1.7	First surveillance	Who is at increased risk of developing CRC or advanced adenomas post-polypectomy (polyp clearance) at index colonoscopy?	Adults (18 years or over) who have been diagnosed with at least one colorectal adenoma and all detected adenomas have been resected completely.	Patient: Male gender	Patient: Female gender	Advanced adenoma incidence at next surveillance (diameter &ge;10mm or HGD or villous component &ge;25%); CRC incidence at next surveillance (includes interval CRCs as well if reported); Long-term CRC incidence; Long-term CRC mortality
CQ1.8	First surveillance	Who is at increased risk of developing CRC or advanced adenomas post-polypectomy (polyp clearance) at index colonoscopy?	Adults (18 years or over) who have been diagnosed with at least one colorectal adenoma and all detected adenomas have been resected completely.	Patient: Family history of CRC	Patient: NO Family history of CRC	Advanced adenoma incidence at next surveillance (diameter &ge;10mm or HGD or villous component &ge;25%); CRC incidence at next surveillance (includes interval CRCs as well if reported); Long-term CRC incidence; Long-term CRC mortality
CQ1.9	First surveillance	Who is at increased risk of developing CRC or advanced adenomas post-polypectomy (polyp clearance) at index colonoscopy?	Adults (18 years or over) who have been diagnosed with at least one colorectal adenoma and all detected adenomas have been resected completely.	Patient: Younger age (e.g. <55 vs 55+; there will be other variants of age cut-off and we would like to capture these too)	Patient: NOT in Younger age range	Advanced adenoma incidence at next surveillance (diameter &ge;10mm or HGD or villous component &ge;25%); CRC incidence at next surveillance (includes interval CRCs as well if reported); Long-term CRC incidence; Long-term CRC mortality
CQ1.10	First surveillance Stop surveillance criteria	Who is at increased risk of developing CRC or advanced adenomas post-polypectomy (polyp clearance) at index colonoscopy?	Adults (18 years or over) who have been diagnosed with at least one colorectal adenoma and all detected adenomas have been resected completely.	Patient: Older age (e.g. <75 vs 75+; there will be other variants of age cut-off and we would like to capture these too)	Patient: NOT in Older age range	Advanced adenoma incidence at next surveillance (diameter &ge;10mm or HGD or villous component &ge;25%); CRC incidence at next surveillance (includes interval CRCs as well if reported); Long-term CRC incidence; Long-term CRC mortality
CQ1.11	First surveillance	Who is at increased risk of developing CRC or advanced adenomas post-polypectomy (polyp clearance) at index colonoscopy?	Adults (18 years or over) who have been diagnosed with at least one colorectal adenoma and all detected adenomas have been resected completely.	Patient: Smoking (variants: current, ex, never)	N/a	Advanced adenoma incidence at next surveillance (diameter &ge;10mm or HGD or villous component &ge;25%); CRC incidence at next surveillance (includes interval CRCs as well if reported); Long-term CRC incidence; Long-term CRC mortality
CQ1.12	First surveillance	Who is at increased risk of developing CRC or advanced adenomas post-polypectomy (polyp clearance) at index colonoscopy?	Adults (18 years or over) who have been diagnosed with at least one colorectal adenoma and all detected adenomas have been resected completely.	Patient: High body mass index (e.g. BMI>25)?	Patient: NOT High body mass index	Advanced adenoma incidence at next surveillance (diameter &ge;10mm or HGD or villous component &ge;25%); CRC incidence at next surveillance (includes interval CRCs as well if reported); Long-term CRC incidence; Long-term CRC mortality
CQ1.13	First surveillance Quality of procedure	Who is at increased risk of developing CRC or advanced adenomas post-polypectomy (polyp clearance) at index colonoscopy?	Adults (18 years or over) who have been diagnosed with at least one colorectal adenoma and all detected adenomas have been resected completely.	Index colonoscopy Bowel prep quality (variants: good, adequate, inadequate/poor)	Inadequate/poor bowel prep	Advanced adenoma incidence at next surveillance (diameter &ge;10mm or HGD or villous component &ge;25%); CRC incidence at next surveillance (includes interval CRCs as well if reported); Long-term CRC incidence; Long-term CRC mortality
CQ1.14	First surveillance Quality of procedure	Who is at increased risk of developing CRC or advanced adenomas post-polypectomy (polyp clearance) at index colonoscopy?	Adults (18 years or over) who have been diagnosed with at least one colorectal adenoma and all detected adenomas have been resected completely.	Index colonoscopy complete to caecum	incompete colonoscopy	Advanced adenoma incidence at next surveillance (diameter &ge;10mm or HGD or villous component &ge;25%); CRC incidence at next surveillance (includes interval CRCs as well if reported); Long-term CRC incidence; Long-term CRC mortality
CQ1.15	First surveillance Quality of procedure	Who is at increased risk of developing CRC or advanced adenomas post-polypectomy (polyp clearance) at index colonoscopy?	Adults (18 years or over) who have been diagnosed with at least one colorectal adenoma and all detected adenomas have been resected completely.	Index colonoscopy by high-quality colonoscopist	NOT high quality colonoscopist	Advanced adenoma incidence at next surveillance (diameter &ge;10mm or HGD or villous component &ge;25%); CRC incidence at next surveillance (includes interval CRCs as well if reported); Long-term CRC incidence; Long-term CRC mortality
CQ1.16	First surveillance	Who is at increased risk of developing CRC or advanced adenomas post-polypectomy (polyp clearance) at index colonoscopy?	Adults (18 years or over) who have been diagnosed with at least one colorectal adenoma and all detected adenomas have been resected completely.	Index colonoscopy using high-adenoma-detecting technologies (variants: HD scope, chromoendoscopy)	no high-adenoma-detecting technologies	Advanced adenoma incidence at next surveillance (diameter &ge;10mm or HGD or villous component &ge;25%); CRC incidence at next surveillance (includes interval CRCs as well if reported); Long-term CRC incidence; Long-term CRC mortality
CQ2.1	First surveillance	What is the evidence that 1st surveillance (as opposed to index colonoscopy polyp clearance) reduces future CRC risk?	Adults (18 years or over) who have been diagnosed with at least one colorectal adenoma and all detected adenomas have been resected completely.	Colonoscopic surveillence (categorised by Polyp: High grade dysplasia)	No surveillance	Long-term CRC incidence; Long-term CRC mortality; with general population comparator where reported; to include health economic analyses
CQ2.2	First surveillance	What is the evidence that 1st surveillance (as opposed to index colonoscopy polyp clearance) reduces future CRC risk?	Adults (18 years or over) who have been diagnosed with at least one colorectal adenoma and all detected adenomas have been resected completely.	Colonoscopic surveillence (categorised by Polyp: Villous component ≥25% (tubulovillous or villous histology)	No surveillance	Long-term CRC incidence; Long-term CRC mortality; with general population comparator where reported; to include health economic analyses
CQ2.3	First surveillance	What is the evidence that 1st surveillance (as opposed to index colonoscopy polyp clearance) reduces future CRC risk?	Adults (18 years or over) who have been diagnosed with at least one colorectal adenoma and all detected adenomas have been resected completely.	Colonoscopic surveillence (categorised by Polyp: Size of largest adenoma (variants: ≥10mm, or ≥20mm)	No surveillance	Long-term CRC incidence; Long-term CRC mortality; with general population comparator where reported; to include health economic analyses
CQ2.4	First surveillance	What is the evidence that 1st surveillance (as opposed to index colonoscopy polyp clearance) reduces future CRC risk?	Adults (18 years or over) who have been diagnosed with at least one colorectal adenoma and all detected adenomas have been resected completely.	Colonoscopic surveillence (categorised by Polyp: Number of adenomas (variants: 1,2,3,4,5-9,10+; the main categories may be 1-2, 3-4 and 5+ but we would like to capture all reported variations)	No surveillance	Long-term CRC incidence; Long-term CRC mortality; with general population comparator where reported; to include health economic analyses
CQ2.5	First surveillance	What is the evidence that 1st surveillance (as opposed to index colonoscopy polyp clearance) reduces future CRC risk?	Adults (18 years or over) who have been diagnosed with at least one colorectal adenoma and all detected adenomas have been resected completely.	Colonoscopic surveillence (categorised by Polyp: Presence of adenoma in proximal colon	No surveillance	Long-term CRC incidence; Long-term CRC mortality; with general population comparator where reported; to include health economic analyses
CQ2.6	First surveillance	What is the evidence that 1st surveillance (as opposed to index colonoscopy polyp clearance) reduces future CRC risk?	Adults (18 years or over) who have been diagnosed with at least one colorectal adenoma and all detected adenomas have been resected completely.	Colonoscopic surveillence (categorised by Polyp: Adenoma morphology (variants: pedunculated, sessile, flat)	No surveillance	Long-term CRC incidence; Long-term CRC mortality; with general population comparator where reported; to include health economic analyses
CQ2.7	First surveillance	What is the evidence that 1st surveillance (as opposed to index colonoscopy polyp clearance) reduces future CRC risk?	Adults (18 years or over) who have been diagnosed with at least one colorectal adenoma and all detected adenomas have been resected completely.	Colonoscopic surveillence (categorised by Patient: Male gender	No surveillance	Long-term CRC incidence; Long-term CRC mortality; with general population comparator where reported; to include health economic analyses
CQ2.8	First surveillance	What is the evidence that 1st surveillance (as opposed to index colonoscopy polyp clearance) reduces future CRC risk?	Adults (18 years or over) who have been diagnosed with at least one colorectal adenoma and all detected adenomas have been resected completely.	Colonoscopic surveillence (categorised by Patient: Family history of CRC	No surveillance	Long-term CRC incidence; Long-term CRC mortality; with general population comparator where reported; to include health economic analyses
CQ2.9	First surveillance	What is the evidence that 1st surveillance (as opposed to index colonoscopy polyp clearance) reduces future CRC risk?	Adults (18 years or over) who have been diagnosed with at least one colorectal adenoma and all detected adenomas have been resected completely.	Colonoscopic surveillence (categorised by Patient: Younger age (e.g. <55 vs 55+; there will be other variants of age cut-off and we would like to capture these too)	No surveillance	Long-term CRC incidence; Long-term CRC mortality; with general population comparator where reported; to include health economic analyses
CQ2.10	First surveillance	What is the evidence that 1st surveillance (as opposed to index colonoscopy polyp clearance) reduces future CRC risk?	Adults (18 years or over) who have been diagnosed with at least one colorectal adenoma and all detected adenomas have been resected completely.	Colonoscopic surveillence (categorised by Patient: Older age (e.g. <75 vs 75+; there will be other variants of age cut-off and we would like to capture these too)	No surveillance	Long-term CRC incidence; Long-term CRC mortality; with general population comparator where reported; to include health economic analyses
CQ2.11	First surveillance	What is the evidence that 1st surveillance (as opposed to index colonoscopy polyp clearance) reduces future CRC risk?	Adults (18 years or over) who have been diagnosed with at least one colorectal adenoma and all detected adenomas have been resected completely.	Colonoscopic surveillence (categorised by Patient: Smoking (variants: current, ex, never)	No surveillance	Long-term CRC incidence; Long-term CRC mortality; with general population comparator where reported; to include health economic analyses
CQ2.12	First surveillance	What is the evidence that 1st surveillance (as opposed to index colonoscopy polyp clearance) reduces future CRC risk?	Adults (18 years or over) who have been diagnosed with at least one colorectal adenoma and all detected adenomas have been resected completely.	Colonoscopic surveillence (categorised by Patient: High body mass index (e.g. BMI>25)?	No surveillance	Long-term CRC incidence; Long-term CRC mortality; with general population comparator where reported; to include health economic analyses
CQ2.13	First surveillance	What is the evidence that 1st surveillance (as opposed to index colonoscopy polyp clearance) reduces future CRC risk?	Adults (18 years or over) who have been diagnosed with at least one colorectal adenoma and all detected adenomas have been resected completely.	Colonoscopic surveillence (categorised by Index colonoscopy Bowel prep quality (variants: good, adequate, inadequate/poor)	No surveillance	Long-term CRC incidence; Long-term CRC mortality; with general population comparator where reported; to include health economic analyses
CQ2.14	First surveillance	What is the evidence that 1st surveillance (as opposed to index colonoscopy polyp clearance) reduces future CRC risk?	Adults (18 years or over) who have been diagnosed with at least one colorectal adenoma and all detected adenomas have been resected completely.	Colonoscopic surveillence (categorised by Index colonoscopy complete to caecum	No surveillance	Long-term CRC incidence; Long-term CRC mortality; with general population comparator where reported; to include health economic analyses
CQ2.15	First surveillance	What is the evidence that 1st surveillance (as opposed to index colonoscopy polyp clearance) reduces future CRC risk?	Adults (18 years or over) who have been diagnosed with at least one colorectal adenoma and all detected adenomas have been resected completely.	Colonoscopic surveillence (categorised by Index colonoscopy by high-quality colonoscopist	No surveillance	Long-term CRC incidence; Long-term CRC mortality; with general population comparator where reported; to include health economic analyses
CQ2.16	First surveillance	What is the evidence that 1st surveillance (as opposed to index colonoscopy polyp clearance) reduces future CRC risk?	Adults (18 years or over) who have been diagnosed with at least one colorectal adenoma and all detected adenomas have been resected completely.	Colonoscopic surveillence (categorised by Index colonoscopy using high-adenoma-detecting technologies (variants: HD scope, chromoendoscopy)	No surveillance	Long-term CRC incidence; Long-term CRC mortality; with general population comparator where reported; to include health economic analyses
CQ3	First surveillance	At what interval should 1st surveillance be performed?	Adults (18 years or over) who have been diagnosed with at least one colorectal adenoma and all detected adenomas have been resected completely; subcategorised as per CQ1	"Longer" interval (we would like to review all surveillance interval variants)	"Shorter" interval	Advanced adenoma incidence at next surveillance (diameter ≥10mm or HGD or villous component ≥25%); CRC incidence at next surveillance (includes interval CRCs as well if reported); Long-term CRC incidence; Long-term CRC mortality
CQ4.1	Second surveillance	Who is at higher risk of developing CRC or advanced adenomas post-1st surveillance?	Adults (18 years or over) who have completed first surveillance colonoscopy	Findings at 1st surveillance alone; Polyp: High grade dysplasia	Absence of I	Advanced adenoma incidence at next surveillance (diameter ≥10mm or HGD or villous component ≥25%); CRC incidence at next surveillance (includes interval CRCs as well if reported); Long-term CRC incidence; Long-term CRC mortality
CQ4.2	Second surveillance	Who is at higher risk of developing CRC or advanced adenomas post-1st surveillance?	Adults (18 years or over) who have completed first surveillance colonoscopy	Findings at 1st surveillance alone; Polyp: Villous component ≥25% (tubulovillous or villous histology)	Absence of I	Advanced adenoma incidence at next surveillance (diameter ≥10mm or HGD or villous component ≥25%); CRC incidence at next surveillance (includes interval CRCs as well if reported); Long-term CRC incidence; Long-term CRC mortality
CQ4.3	Second surveillance	Who is at higher risk of developing CRC or advanced adenomas post-1st surveillance?	Adults (18 years or over) who have completed first surveillance colonoscopy	Findings at 1st surveillance alone; Polyp: Size of largest adenoma (variants: ≥10mm, or ≥20mm)	Absence of I	Advanced adenoma incidence at next surveillance (diameter ≥10mm or HGD or villous component ≥25%); CRC incidence at next surveillance (includes interval CRCs as well if reported); Long-term CRC incidence; Long-term CRC mortality
CQ4.4	Second surveillance	Who is at higher risk of developing CRC or advanced adenomas post-1st surveillance?	Adults (18 years or over) who have completed first surveillance colonoscopy	Findings at 1st surveillance alone; Polyp: Number of adenomas (variants: 1,2,3,4,5-9,10+; the main categories may be 1-2, 3-4 and 5+ but we would like to capture all reported variations)	Absence of I	Advanced adenoma incidence at next surveillance (diameter ≥10mm or HGD or villous component ≥25%); CRC incidence at next surveillance (includes interval CRCs as well if reported); Long-term CRC incidence; Long-term CRC mortality
CQ4.5	Second surveillance	Who is at higher risk of developing CRC or advanced adenomas post-1st surveillance?	Adults (18 years or over) who have completed first surveillance colonoscopy	Findings at 1st surveillance alone; Polyp: Presence of adenoma in proximal colon	Absence of I	Advanced adenoma incidence at next surveillance (diameter ≥10mm or HGD or villous component ≥25%); CRC incidence at next surveillance (includes interval CRCs as well if reported); Long-term CRC incidence; Long-term CRC mortality
CQ4.6	Second surveillance	Who is at higher risk of developing CRC or advanced adenomas post-1st surveillance?	Adults (18 years or over) who have completed first surveillance colonoscopy	Findings at 1st surveillance alone; Polyp: Adenoma morphology (variants: pedunculated, sessile, flat)	Absence of I	Advanced adenoma incidence at next surveillance (diameter ≥10mm or HGD or villous component ≥25%); CRC incidence at next surveillance (includes interval CRCs as well if reported); Long-term CRC incidence; Long-term CRC mortality
CQ4.7	Second surveillance	Who is at higher risk of developing CRC or advanced adenomas post-1st surveillance?	Adults (18 years or over) who have completed first surveillance colonoscopy	Findings at 1st surveillance alone; Patient: Male gender	Absence of I	Advanced adenoma incidence at next surveillance (diameter ≥10mm or HGD or villous component ≥25%); CRC incidence at next surveillance (includes interval CRCs as well if reported); Long-term CRC incidence; Long-term CRC mortality
CQ4.8	Second surveillance	Who is at higher risk of developing CRC or advanced adenomas post-1st surveillance?	Adults (18 years or over) who have completed first surveillance colonoscopy	Findings at 1st surveillance alone; Patient: Family history of CRC	Absence of I	Advanced adenoma incidence at next surveillance (diameter ≥10mm or HGD or villous component ≥25%); CRC incidence at next surveillance (includes interval CRCs as well if reported); Long-term CRC incidence; Long-term CRC mortality
CQ4.9	Second surveillance	Who is at higher risk of developing CRC or advanced adenomas post-1st surveillance?	Adults (18 years or over) who have completed first surveillance colonoscopy	Findings at 1st surveillance alone; Patient: Younger age (e.g. <55 vs 55+; there will be other variants of age cut-off and we would like to capture these too)	Absence of I	Advanced adenoma incidence at next surveillance (diameter ≥10mm or HGD or villous component ≥25%); CRC incidence at next surveillance (includes interval CRCs as well if reported); Long-term CRC incidence; Long-term CRC mortality
CQ4.10	Second surveillance	Who is at higher risk of developing CRC or advanced adenomas post-1st surveillance?	Adults (18 years or over) who have completed first surveillance colonoscopy	Findings at 1st surveillance alone; Patient: Older age (e.g. <75 vs 75+; there will be other variants of age cut-off and we would like to capture these too)	Absence of I	Advanced adenoma incidence at next surveillance (diameter ≥10mm or HGD or villous component ≥25%); CRC incidence at next surveillance (includes interval CRCs as well if reported); Long-term CRC incidence; Long-term CRC mortality
CQ4.11	Second surveillance	Who is at higher risk of developing CRC or advanced adenomas post-1st surveillance?	Adults (18 years or over) who have completed first surveillance colonoscopy	Findings at 1st surveillance alone; Patient: Smoking (variants: current, ex, never)	Absence of I	Advanced adenoma incidence at next surveillance (diameter ≥10mm or HGD or villous component ≥25%); CRC incidence at next surveillance (includes interval CRCs as well if reported); Long-term CRC incidence; Long-term CRC mortality
CQ4.12	Second surveillance	Who is at higher risk of developing CRC or advanced adenomas post-1st surveillance?	Adults (18 years or over) who have completed first surveillance colonoscopy	Findings at 1st surveillance alone; Patient: High body mass index (e.g. BMI>25)?	Absence of I	Advanced adenoma incidence at next surveillance (diameter ≥10mm or HGD or villous component ≥25%); CRC incidence at next surveillance (includes interval CRCs as well if reported); Long-term CRC incidence; Long-term CRC mortality
CQ4.13	Second surveillance	Who is at higher risk of developing CRC or advanced adenomas post-1st surveillance?	Adults (18 years or over) who have completed first surveillance colonoscopy	Findings at 1st surveillance alone; Index colonoscopy Bowel prep quality (variants: good, adequate, inadequate/poor)	Absence of I	Advanced adenoma incidence at next surveillance (diameter ≥10mm or HGD or villous component ≥25%); CRC incidence at next surveillance (includes interval CRCs as well if reported); Long-term CRC incidence; Long-term CRC mortality
CQ4.14	Second surveillance	Who is at higher risk of developing CRC or advanced adenomas post-1st surveillance?	Adults (18 years or over) who have completed first surveillance colonoscopy	Findings at 1st surveillance alone; Index colonoscopy complete to caecum	Absence of I	Advanced adenoma incidence at next surveillance (diameter ≥10mm or HGD or villous component ≥25%); CRC incidence at next surveillance (includes interval CRCs as well if reported); Long-term CRC incidence; Long-term CRC mortality
CQ4.15	Second surveillance	Who is at higher risk of developing CRC or advanced adenomas post-1st surveillance?	Adults (18 years or over) who have completed first surveillance colonoscopy	Findings at 1st surveillance alone; Index colonoscopy by high-quality colonoscopist	Absence of I	Advanced adenoma incidence at next surveillance (diameter ≥10mm or HGD or villous component ≥25%); CRC incidence at next surveillance (includes interval CRCs as well if reported); Long-term CRC incidence; Long-term CRC mortality
CQ4.16	Second surveillance	Who is at higher risk of developing CRC or advanced adenomas post-1st surveillance?	Adults (18 years or over) who have completed first surveillance colonoscopy	Findings at 1st surveillance alone; Index colonoscopy using high-adenoma-detecting technologies (variants: HD scope, chromoendoscopy)	Absence of I	Advanced adenoma incidence at next surveillance (diameter ≥10mm or HGD or villous component ≥25%); CRC incidence at next surveillance (includes interval CRCs as well if reported); Long-term CRC incidence; Long-term CRC mortality
CQ5.1	Second surveillance	Who is at higher risk of developing CRC or advanced adenomas post-1st surveillance?	Adults (18 years or over) who have completed first surveillance colonoscopy	Summative findings of index plus 1st surveillance; Polyp: High grade dysplasia	Absence of I	Advanced adenoma incidence at next surveillance (diameter ≥10mm or HGD or villous component ≥25%); CRC incidence at next surveillance (includes interval CRCs as well if reported); Long-term CRC incidence; Long-term CRC mortality
CQ5.2	Second surveillance	Who is at higher risk of developing CRC or advanced adenomas post-1st surveillance?	Adults (18 years or over) who have completed first surveillance colonoscopy	Summative findings of index plus 1st surveillance; Polyp: Villous component ≥25% (tubulovillous or villous histology)	Absence of I	Advanced adenoma incidence at next surveillance (diameter ≥10mm or HGD or villous component ≥25%); CRC incidence at next surveillance (includes interval CRCs as well if reported); Long-term CRC incidence; Long-term CRC mortality
CQ5.3	Second surveillance	Who is at higher risk of developing CRC or advanced adenomas post-1st surveillance?	Adults (18 years or over) who have completed first surveillance colonoscopy	Summative findings of index plus 1st surveillance; Polyp: Size of largest adenoma (variants: ≥10mm, or ≥20mm)	Absence of I	Advanced adenoma incidence at next surveillance (diameter ≥10mm or HGD or villous component ≥25%); CRC incidence at next surveillance (includes interval CRCs as well if reported); Long-term CRC incidence; Long-term CRC mortality
CQ5.4	Second surveillance	Who is at higher risk of developing CRC or advanced adenomas post-1st surveillance?	Adults (18 years or over) who have completed first surveillance colonoscopy	Summative findings of index plus 1st surveillance; Polyp: Number of adenomas (variants: 1,2,3,4,5-9,10+; the main categories may be 1-2, 3-4 and 5+ but we would like to capture all reported variations)	Absence of I	Advanced adenoma incidence at next surveillance (diameter ≥10mm or HGD or villous component ≥25%); CRC incidence at next surveillance (includes interval CRCs as well if reported); Long-term CRC incidence; Long-term CRC mortality
CQ5.5	Second surveillance	Who is at higher risk of developing CRC or advanced adenomas post-1st surveillance?	Adults (18 years or over) who have completed first surveillance colonoscopy	Summative findings of index plus 1st surveillance; Polyp: Presence of adenoma in proximal colon	Absence of I	Advanced adenoma incidence at next surveillance (diameter ≥10mm or HGD or villous component ≥25%); CRC incidence at next surveillance (includes interval CRCs as well if reported); Long-term CRC incidence; Long-term CRC mortality
CQ5.6	Second surveillance	Who is at higher risk of developing CRC or advanced adenomas post-1st surveillance?	Adults (18 years or over) who have completed first surveillance colonoscopy	Summative findings of index plus 1st surveillance; Polyp: Adenoma morphology (variants: pedunculated, sessile, flat)	Absence of I	Advanced adenoma incidence at next surveillance (diameter ≥10mm or HGD or villous component ≥25%); CRC incidence at next surveillance (includes interval CRCs as well if reported); Long-term CRC incidence; Long-term CRC mortality
CQ5.7	Second surveillance	Who is at higher risk of developing CRC or advanced adenomas post-1st surveillance?	Adults (18 years or over) who have completed first surveillance colonoscopy	Summative findings of index plus 1st surveillance; Patient: Male gender	Absence of I	Advanced adenoma incidence at next surveillance (diameter ≥10mm or HGD or villous component ≥25%); CRC incidence at next surveillance (includes interval CRCs as well if reported); Long-term CRC incidence; Long-term CRC mortality
CQ5.8	Second surveillance	Who is at higher risk of developing CRC or advanced adenomas post-1st surveillance?	Adults (18 years or over) who have completed first surveillance colonoscopy	Summative findings of index plus 1st surveillance; Patient: Family history of CRC	Absence of I	Advanced adenoma incidence at next surveillance (diameter ≥10mm or HGD or villous component ≥25%); CRC incidence at next surveillance (includes interval CRCs as well if reported); Long-term CRC incidence; Long-term CRC mortality
CQ5.9	Second surveillance	Who is at higher risk of developing CRC or advanced adenomas post-1st surveillance?	Adults (18 years or over) who have completed first surveillance colonoscopy	Summative findings of index plus 1st surveillance; Patient: Younger age (e.g. <55 vs 55+; there will be other variants of age cut-off and we would like to capture these too)	Absence of I	Advanced adenoma incidence at next surveillance (diameter ≥10mm or HGD or villous component ≥25%); CRC incidence at next surveillance (includes interval CRCs as well if reported); Long-term CRC incidence; Long-term CRC mortality
CQ5.10	Second surveillance	Who is at higher risk of developing CRC or advanced adenomas post-1st surveillance?	Adults (18 years or over) who have completed first surveillance colonoscopy	Summative findings of index plus 1st surveillance; Patient: Older age (e.g. <75 vs 75+; there will be other variants of age cut-off and we would like to capture these too)	Absence of I	Advanced adenoma incidence at next surveillance (diameter ≥10mm or HGD or villous component ≥25%); CRC incidence at next surveillance (includes interval CRCs as well if reported); Long-term CRC incidence; Long-term CRC mortality
CQ5.11	Second surveillance	Who is at higher risk of developing CRC or advanced adenomas post-1st surveillance?	Adults (18 years or over) who have completed first surveillance colonoscopy	Summative findings of index plus 1st surveillance; Patient: Smoking (variants: current, ex, never)	Absence of I	Advanced adenoma incidence at next surveillance (diameter ≥10mm or HGD or villous component ≥25%); CRC incidence at next surveillance (includes interval CRCs as well if reported); Long-term CRC incidence; Long-term CRC mortality
CQ5.12	Second surveillance	Who is at higher risk of developing CRC or advanced adenomas post-1st surveillance?	Adults (18 years or over) who have completed first surveillance colonoscopy	Summative findings of index plus 1st surveillance; Patient: High body mass index (e.g. BMI>25)?	Absence of I	Advanced adenoma incidence at next surveillance (diameter ≥10mm or HGD or villous component ≥25%); CRC incidence at next surveillance (includes interval CRCs as well if reported); Long-term CRC incidence; Long-term CRC mortality
CQ5.13	Second surveillance	Who is at higher risk of developing CRC or advanced adenomas post-1st surveillance?	Adults (18 years or over) who have completed first surveillance colonoscopy	Summative findings of index plus 1st surveillance; Index colonoscopy Bowel prep quality (variants: good, adequate, inadequate/poor)	Absence of I	Advanced adenoma incidence at next surveillance (diameter ≥10mm or HGD or villous component ≥25%); CRC incidence at next surveillance (includes interval CRCs as well if reported); Long-term CRC incidence; Long-term CRC mortality
CQ5.14	Second surveillance	Who is at higher risk of developing CRC or advanced adenomas post-1st surveillance?	Adults (18 years or over) who have completed first surveillance colonoscopy	Summative findings of index plus 1st surveillance; Index colonoscopy complete to caecum	Absence of I	Advanced adenoma incidence at next surveillance (diameter ≥10mm or HGD or villous component ≥25%); CRC incidence at next surveillance (includes interval CRCs as well if reported); Long-term CRC incidence; Long-term CRC mortality
CQ5.15	Second surveillance	Who is at higher risk of developing CRC or advanced adenomas post-1st surveillance?	Adults (18 years or over) who have completed first surveillance colonoscopy	Summative findings of index plus 1st surveillance; Index colonoscopy by high-quality colonoscopist	Absence of I	Advanced adenoma incidence at next surveillance (diameter ≥10mm or HGD or villous component ≥25%); CRC incidence at next surveillance (includes interval CRCs as well if reported); Long-term CRC incidence; Long-term CRC mortality
CQ5.16	Second surveillance	Who is at higher risk of developing CRC or advanced adenomas post-1st surveillance?	Adults (18 years or over) who have completed first surveillance colonoscopy	Summative findings of index plus 1st surveillance; Index colonoscopy using high-adenoma-detecting technologies (variants: HD scope, chromoendoscopy)	Absence of I	Advanced adenoma incidence at next surveillance (diameter ≥10mm or HGD or villous component ≥25%); CRC incidence at next surveillance (includes interval CRCs as well if reported); Long-term CRC incidence; Long-term CRC mortality
CQ6.1	Second surveillance	What is the evidence that 2nd (and subsequent) surveillance reduces future CRC risk?	Adults (18 years or over) who have completed first surveillance colonoscopy	Polyp: High grade dysplasia	No 2nd surveillance	Long-term CRC incidence; Long-term CRC mortality; with general population comparator where reported; to include health economic analyses
CQ6.2	Second surveillance	What is the evidence that 2nd (and subsequent) surveillance reduces future CRC risk?	Adults (18 years or over) who have completed first surveillance colonoscopy	Polyp: Villous component ≥25% (tubulovillous or villous histology)	No 2nd surveillance	Long-term CRC incidence; Long-term CRC mortality; with general population comparator where reported; to include health economic analyses
CQ6.3	Second surveillance	What is the evidence that 2nd (and subsequent) surveillance reduces future CRC risk?	Adults (18 years or over) who have completed first surveillance colonoscopy	Polyp: Size of largest adenoma (variants: ≥10mm, or ≥20mm)	No 2nd surveillance	Long-term CRC incidence; Long-term CRC mortality; with general population comparator where reported; to include health economic analyses
CQ6.4	Second surveillance	What is the evidence that 2nd (and subsequent) surveillance reduces future CRC risk?	Adults (18 years or over) who have completed first surveillance colonoscopy	Polyp: Number of adenomas (variants: 1,2,3,4,5-9,10+; the main categories may be 1-2, 3-4 and 5+ but we would like to capture all reported variations)	No 2nd surveillance	Long-term CRC incidence; Long-term CRC mortality; with general population comparator where reported; to include health economic analyses
CQ6.5	Second surveillance	What is the evidence that 2nd (and subsequent) surveillance reduces future CRC risk?	Adults (18 years or over) who have completed first surveillance colonoscopy	Polyp: Presence of adenoma in proximal colon	No 2nd surveillance	Long-term CRC incidence; Long-term CRC mortality; with general population comparator where reported; to include health economic analyses
CQ6.6	Second surveillance	What is the evidence that 2nd (and subsequent) surveillance reduces future CRC risk?	Adults (18 years or over) who have completed first surveillance colonoscopy	Polyp: Adenoma morphology (variants: pedunculated, sessile, flat)	No 2nd surveillance	Long-term CRC incidence; Long-term CRC mortality; with general population comparator where reported; to include health economic analyses
CQ6.7	Second surveillance	What is the evidence that 2nd (and subsequent) surveillance reduces future CRC risk?	Adults (18 years or over) who have completed first surveillance colonoscopy	Patient: Male gender	No 2nd surveillance	Long-term CRC incidence; Long-term CRC mortality; with general population comparator where reported; to include health economic analyses
CQ6.8	Second surveillance	What is the evidence that 2nd (and subsequent) surveillance reduces future CRC risk?	Adults (18 years or over) who have completed first surveillance colonoscopy	Patient: Family history of CRC	No 2nd surveillance	Long-term CRC incidence; Long-term CRC mortality; with general population comparator where reported; to include health economic analyses
CQ6.9	Second surveillance	What is the evidence that 2nd (and subsequent) surveillance reduces future CRC risk?	Adults (18 years or over) who have completed first surveillance colonoscopy	Patient: Younger age (e.g. <55 vs 55+; there will be other variants of age cut-off and we would like to capture these too)	No 2nd surveillance	Long-term CRC incidence; Long-term CRC mortality; with general population comparator where reported; to include health economic analyses
CQ6.10	Second surveillance	What is the evidence that 2nd (and subsequent) surveillance reduces future CRC risk?	Adults (18 years or over) who have completed first surveillance colonoscopy	Patient: Older age (e.g. <75 vs 75+; there will be other variants of age cut-off and we would like to capture these too)	No 2nd surveillance	Long-term CRC incidence; Long-term CRC mortality; with general population comparator where reported; to include health economic analyses
CQ6.11	Second surveillance	What is the evidence that 2nd (and subsequent) surveillance reduces future CRC risk?	Adults (18 years or over) who have completed first surveillance colonoscopy	Patient: Smoking (variants: current, ex, never)	No 2nd surveillance	Long-term CRC incidence; Long-term CRC mortality; with general population comparator where reported; to include health economic analyses
CQ6.12	Second surveillance	What is the evidence that 2nd (and subsequent) surveillance reduces future CRC risk?	Adults (18 years or over) who have completed first surveillance colonoscopy	Patient: High body mass index (e.g. BMI>25)?	No 2nd surveillance	Long-term CRC incidence; Long-term CRC mortality; with general population comparator where reported; to include health economic analyses
CQ6.13	Second surveillance	What is the evidence that 2nd (and subsequent) surveillance reduces future CRC risk?	Adults (18 years or over) who have completed first surveillance colonoscopy	Index colonoscopy Bowel prep quality (variants: good, adequate, inadequate/poor)	No 2nd surveillance	Long-term CRC incidence; Long-term CRC mortality; with general population comparator where reported; to include health economic analyses
CQ6.14	Second surveillance	What is the evidence that 2nd (and subsequent) surveillance reduces future CRC risk?	Adults (18 years or over) who have completed first surveillance colonoscopy	Index colonoscopy complete to caecum	No 2nd surveillance	Long-term CRC incidence; Long-term CRC mortality; with general population comparator where reported; to include health economic analyses
CQ6.15	Second surveillance	What is the evidence that 2nd (and subsequent) surveillance reduces future CRC risk?	Adults (18 years or over) who have completed first surveillance colonoscopy	Index colonoscopy by high-quality colonoscopist	No 2nd surveillance	Long-term CRC incidence; Long-term CRC mortality; with general population comparator where reported; to include health economic analyses
CQ6.16	Second surveillance	What is the evidence that 2nd (and subsequent) surveillance reduces future CRC risk?	Adults (18 years or over) who have completed first surveillance colonoscopy	Index colonoscopy using high-adenoma-detecting technologies (variants: HD scope, chromoendoscopy)	No 2nd surveillance	Long-term CRC incidence; Long-term CRC mortality; with general population comparator where reported; to include health economic analyses
CQ7	Second surveillance	At what interval should 2nd (and subsequent) surveillance be performed?	Adults (18 years or over) who have completed first surveillance colonoscopy	"Longer" interval (we would like to review all surveillance interval variants)	"Shorter" interval	Advanced adenoma incidence at next surveillance (diameter ≥10mm or HGD or villous component ≥25%); CRC incidence at next surveillance (includes interval CRCs as well if reported); Long-term CRC incidence; Long-term CRC mortality
CQ8	Stop surveillance criteria	At what age can surveillance be stopped without increasing the risk of CRC development?	Adults >75 years (or other older age cohort) who have been diagnosed with at least one colorectal adenoma and all detected adenomas have been resected completely at baseline; and adults >75 years (or other older age cohort) who have undergone potentially curative treatment for primary CRC and have had a baseline clearance colonoscopy.	endoscopic surveillance	No surveillance	Subsequent CRC incidence, CRC mortality, all cause mortality
CQ9	Stop surveillance criteria	At what estimate of life expectancy can surveillance be stopped without increasing the risk of CRC development?	Adults age >65 who have a life expectancy at 5 years of <60% (e.g. By Schonberg Index)	endoscopic surveillance	No surveillance	Subsequent CRC incidence, CRC mortality, all cause mortality
CQ10	Stop surveillance criteria	What is the risk of colonoscopy in adults >75 years (or other older age cohort)	Adults >75 who have undergone colonoscopy for any indication	colonoscopy	No colonoscopy	Subsequent mortality or significant morbidity
CQ11	Stop surveillance criteria	When (and in whom) can surveillance be stopped, relating to colonoscopy findings?	No PICO	No PICO	No PICO	No PICO
CQ12	Stop surveillance criteria	What threshold (cut-off) should be used to determine whether surveillance is indicated?	No PICO	No PICO	No PICO	No PICO
CQ13	Pathology yield from non-surveillance comparators	What is the risk of CRC/AA/any adenomas in the general population?	Asymptomatic adults (18+ years) in the general population (average risk) undergoing screening colonoscopy (note - this excludes people who undergo colonoscopy for symptoms, or colonoscopy following positive faecal occult blood screening test); stratified by age/gender	colonoscopy	-	Prevalence at colonoscopy of (a) adenomas, (b) advanced neoplasia, (c) colorectal cancer
CQ14	Pathology yield from non-surveillance comparators	What is the risk of CRC/AA/any adenomas in faecal occult blood test screening population at varying FIT thresholds?	Adults (18+ years) undergoing colonoscopy following a positive faecal occult blood screening test; stratified by age/gender; stratified by FOBt type & cut-off	colonoscopy	-	Prevalence at colonoscopy of (a) adenomas, (b) advanced neoplasia, (c) colorectal cancer
CQ15	Pathology yield from non-surveillance comparators	What is the risk of CRC/AA/any adenomas in symptomatic patients?	Adults (18+ years) undergoing colonoscopy for gastrointestinal symptoms; stratified by age/gender; stratified by symptom	colonoscopy	-	Prevalence at colonoscopy of (a) adenomas, (b) advanced neoplasia, (c) colorectal cancer
CQ16	Quality of procedure	Does a high quality colonoscopy have a significant impact on findings (outcomes) at surveillance colonoscopy	Adults undergoing colonoscopy	High quality colonoscopy (please see the components of this in the editorial note for the literature search)	"Standard colonoscopy" (minimum standard) and low quality colonoscopy (e.g. lower withdrawal times, standard definition scope instead of high definition, white light instead of chromoendoscopy, poor bowel prep etc. ) in the components as decribed in the editorial note and clinical question. "Standard" colonoscopy may be defined as that meeting current minimum accepted standards for Caecal intubat…	Advanced adenoma incidence at next surveillance (diameter &ge;10mm or HGD or villous component &ge;25%); CRC incidence at next surveillance (includes interval CRCs as well if reported); Long-term CRC incidence; Long-term CRC mortality
CQ17	Non-colonoscopic surveillance modalities	Can FIT be used for surveillance after resection of adenomas?	Adults (>18 years) who have been diagnosed with at least one colorectal adenoma and all detected adenomas have been resected completely at baseline	FIT surveillance	endoscopic surveillance	Subsequent AA incidence, CRC incidence, CRC mortality. Resource use (e.g. Number of procedures/attendances at follow-up/tests completed). Patient-reported outcomes (e.g. preferences, QoL, satisfaction)? Costs and/or cost-effectiveness? Conversion rate to colonoscopy.
CQ18	Non-colonoscopic surveillance modalities	Can colon capsule be used for surveillance after resection of adenomas?	Adults (>18 years) who have been diagnosed with at least one colorectal adenoma and all detected adenomas have been resected completely at baseline	Capsule surveillance	endoscopic surveillance	Subsequent AA incidence, CRC incidence, CRC mortality. Resource use (e.g. Number of procedures/attendances at follow-up/tests completed). Patient-reported outcomes (e.g. preferences, QoL, satisfaction)? Costs and/or cost-effectiveness? Conversion rate to colonoscopy.
CQ19	Non-colonoscopic surveillance modalities	Can CTC be used for polyp surveillance after curative resection of colorectal cancer?	Adults 18+ years with previous resection of colorectal adenocarcinoma with curative intent	CT colonography	Conventional optical colonoscopy	Sensitivity and specificity of CTC for (a) 6mm+ polyps, (b) 6mm+ adenomas, (c) advanced neoplasia (colorectal cancer or an adenoma with any of: &ge;25% villous, high-grade dysplasia, 10mm+ in maximum dimension), (d) colorectal cancer. Post-imaging colorectal cancer (PICRC) rate after CTC for colonic adenoma surveillance. Costs and cost-effectiveness of CTC surveillance vs. (a) no surveillance and…
CQ20	Non-colonoscopic surveillance modalities	Can CTC be used for polyp surveillance after previous endoscopic polypectomy?	Adults 18+ years with previous endoscopic polypectomy of at least one histologically-proven adenoma	CT colonography	Conventional optical colonoscopy	Sensitivity and specificity of CTC for (a) 6mm+ polyps, (b) 6mm+ adenomas, (c) advanced neoplasia, (d) colorectal cancer. Post-imaging colorectal cancer (PICRC) rate after CTC for colonic adenoma surveillance. Costs and cost-effectiveness of CTC surveillance vs. (a) no surveillance and (b) colonoscopic surveillance.
CQ21	Non-colonoscopic surveillance modalities	What is the risk of the cumulative radiation dose incurred by CTC polyp surveillance and CTC polyp follow-up?	Adults 18+ years requiring CTC	CT colonography	None	Estimated (a) effective radiation dose and (b) radiation-related cancer risk from CTC repeated at (a) 1 year, (b) 2 year, (c) 3 year, (d) 5 year intervals. Risk stratification by age and sex.
CQ22	Post-CRC surgery surveillance	Does surveillance, post-CRC surgical resection, reduce metachronous CRC incidence/mortality? Surgical resection includes open, laparoscopic and robotic.	adults who have undergone potentially curative surgical treatment for primary CRC and have had a baseline clearance colonoscopy. Exclude patients with genetic syndromes predisposing to CRC	FIT; colonoscopy; CT Colonography; Clinical examination; CEA; Imaging (U/S, CT, PET CT, chest x-ray); stratified by frequency of each surveillance modality	absence of "intervention"	Incidence of luminally recurrent or metachronous CRC; CRC mortality; all cause mortality; Quality of life
CQ23	Post-CRC surgery surveillance	Does surveillance, post-CRC endoscopic resection, reduce metachronous CRC incidence/mortality? Endoscopic resection includes endoscopic, transanal, TEMS and its variations	adults who have undergone potentially curative endoscopic treatment for primary CRC and have had a baseline clearance colonoscopy. Exclude patients with genetic syndromes predisposing to CRC	FIT; colonoscopy; CT Colonography; Clinical examination; CEA; Imaging (U/S, CT, PET CT, chest x-ray); stratified by frequency of each surveillance modality	absence of "intervention"	Incidence of luminally recurrent or metachronous CRC; CRC mortality; all cause mortality; Quality of life
CQ24	Post-CRC surgery surveillance	Does surveillance following surgical resection of CRC metastases reduce mortality?	adults who have undergone potentially curative resection for metastatic CRC	FIT; colonoscopy; CT Colonography; Clinical examination; CEA; Imaging (U/S, CT, PET CT, chest x-ray); stratified by frequency of each surveillance modality	absence of "intervention"	Incidence of luminally recurrent or metachronous CRC; CRC mortality; all cause mortality; Quality of life
CQ25.1	Serrated polyps	What is the risk of cancer / advanced neoplasia / neoplasia after detection of a sessile serrated lesion=>10mm / SSL with dyspliasa / traditional serrated adenoma	Adults with a sessile serrated lesion=>10mm / SSL with dyspliasa / traditional serrated adenoma detected at colonoscopy	endoscopic surveillance	No surveillance	Any neoplasia at next surveillance, advanced neoplasia at next surveillance, CRC at next surveillance, Long term CRC incidence, Long term CRC mortality
CQ25.2	Serrated polyps	What is the risk of cancer / advanced neoplasia / neoplasia after detection of a sessile serrated lesion=>10mm / SSL with dyspliasa / traditional serrated adenoma	Adults with a sessile serrated lesion=>10mm / SSL with dyspliasa / traditional serrated adenoma detected at colonoscopy	endoscopic surveillance	No surveillance	Any neoplasia at next surveillance, advanced neoplasia at next surveillance, CRC at next surveillance, Long term CRC incidence, Long term CRC mortality
CQ26.1	Serrated polyps	What is the risk of cancer / advanced neoplasia / neoplasia after detection of a sessile serrated lesion <10mm without dysplasia	Adults with a sessile serrated lesion <10mm SSL or hyperplastic polyps	endoscopic surveillance	No surveillance	Any neoplasia at next surveillance, advanced neoplasia at next surveillance, CRC at next surveillance, Long term CRC incidence, Long term CRC mortality
CQ26.2	Serrated polyps	What is the risk of cancer / advanced neoplasia / neoplasia after detection of a sessile serrated lesion <10mm without dysplasia	Adults with a sessile serrated lesion <10mm SSL or hyperplastic polyps	endoscopic surveillance	No surveillance	Any neoplasia at next surveillance, advanced neoplasia at next surveillance, CRC at next surveillance, Long term CRC incidence, Long term CRC mortality
CQ27.1	Serrated polyps	What is the risk of cancer / advanced neoplasia / neoplasia after detection of serrated polyposis syndrome (hyperplastic polyposis)	Adults with a sessile serrated lesion <10mm SSL or hyperplastic polyps	endoscopic surveillance	No surveillance	Any neoplasia at next surveillance, advanced neoplasia at next surveillance, CRC at next surveillance, Long term CRC incidence, Long term CRC mortality
CQ27.2	Serrated polyps	What is the risk of cancer / advanced neoplasia / neoplasia after detection of serrated polyposis syndrome (hyperplastic polyposis)	Adults with a sessile serrated lesion <10mm SSL or hyperplastic polyps	endoscopic surveillance	No surveillance	Any neoplasia at next surveillance, advanced neoplasia at next surveillance, CRC at next surveillance, Long term CRC incidence, Long term CRC mortality
CQ28	Post-EMR/ESD follow-up	What is the risk of recurrence after complete (En bloc R0) versus piecemeal EMR	Adults meeting WHO criteria 1 or 3 for serrated polyposis syndrome	Endoscopic mucosal resection (EMR) with pathologically clear margins (En bloc R0)	Endoscopic mucosal resection (EMR) without pathologically clear margins (R1) or involved margins or piecemeal resections	Polyp recurrence at 6 months, 12-18 months and 3 years
CQ29	Post-EMR/ESD follow-up	What is the risk of recurrence after complete (En bloc R0) versus piecemeal ESD	Patients undergoing endoscopic resection of polyps =>20mm	Endoscopic submucosal dissection (ESD) with pathologically clear margins (En bloc R0)	Endoscopic submucosal dissection (ESD) without pathologically clear margins (R1) or involved margins or piecemeal resections	Polyp recurrence at 6 months, 12-18 months and 3 years
CQ30	Post-EMR/ESD follow-up	What is the risk of early recurrence after EMR	Patients undergoing endoscopic resection of polyps =>20mm	Endoscopic EMR site check at 3 months	Endoscopic EMR site check at 6 months	Polyp recurrence at site check
CQ31	Polyposis/family history surveillance	Polyposis/family history follow-up	No PICO	No PICO	No PICO	No PICO
CQ32	Other guideline section	Patient communication, including: Patient lifestyle modifications; What information should patient be given? Include transition to new guidelines; How should shared decision-making be supported?	Adults (>18 years) who have been diagnosed with at least one colorectal adenoma and all detected adenomas have been resected completely at baseline	No PICO	No PICO	No PICO
CQ33	Other guideline section	Optical diagnosis – virtual ADR without histology	No PICO	No PICO	No PICO	No PICO
CQ34	Other guideline section	How should polyp size be measured? Endoscopy vs histology	patients undergoing colonoscopy surveillance	size of polyp recorded should be the size as measured at histo-pathological examination	visual estimation of polyo size at colonoscopy for polyps resected and retrieved en bloc	assigning an accurate surveillance interval or frequency
CQ35	Other guideline section	Colonoscopy risks	No PICO	No PICO	No PICO	No PICO
CQ36	Other guideline section	Modelling of workload effect of change in surveillance guidelines	No PICO	No PICO	No PICO	No PICO
CQ38	Other guideline section	How to implement? Validating (and whether prospective or retrospective)	No PICO	No PICO	No PICO	No PICO
CQ39	Other guideline section	Are there any training aspects?	No PICO	No PICO	No PICO	No PICO
CQ40	Other guideline section	What are the key unanswered questions? – priorities for research; what affects drop-out / default rates?; Collecting patient experience data	No PICO	No PICO	No PICO	No PICO
